# Supplementary material for: Role of deltaNp63pos CD44vpos cells in the development of N‐nitroso‐tris‐chloroethylurea‐induced peripheral‐type mouse lung squamous cell carcinomas
Source: PubMed Central journal article supplement — Cancer Sci. 2016 Feb 13;107(2):123–32. doi: 10.1111/cas.12855 (PMC4768398; doi:10.1111/cas.12855), 2016-02-13
Supplement: CAS-107-123-s001.pdf [file CAS-107-123-s001.pdf]

**Supplemental Figure 1:** Clara cell, squamous differentiation, and pulmonary stem cell markers in normal bronchioles and alveoli in Acetone-treated mice and in squamous dysplasia and SCC in NTCU-treated mice.

Normal bronchioles and alveoli in acetone-treated mice (**A1-D1**) and squamous dysplasia (**A2-D2**) and pLSCCs (**A3-D3**) in NTCU-treated mice. CC10 was expressed in normal bronchiolar cells but was rarely detected in squamous dysplasias or pLSCCs (A1-A3). Cells positive for CK5/6 and deltaNp63 were not observed in bronchioles or alveoli in the control mice, but were diffusely present in squamous dysplasias and pLSCCs in NTCU-treated mice (B1-3 and C1-3). A few normal bronchiolar epitheliums were positive for CD44v (D1). In contrast, a number of CD44v-positive cells were observed in the basal cell layers of squamous dysplasias and pLSCCs (D2 and D3). Bar=100  $\mu$ m.

**Supplemental Figure 2:** Co-localization of CC10, deltaNp63, and CD44v or CK5/6 proteins in acetone-treated mouse lung bronchi, bronchioles, and alveoli.

**A, B:** deltaNp63<sup>pos</sup>CD44v<sup>pos</sup> basal cells were only detected in the bronchus, but these cells were negative for CK5/6. **C, D:** Neither deltaNp63<sup>pos</sup>CD44v<sup>pos</sup>CC10<sup>pos</sup> nor deltaNp63<sup>pos</sup>CK5/6<sup>pos</sup>CC10<sup>pos</sup> cells were detected in bronchioles or alveoli. Bar=100  $\mu$ m.

**Supplemental Figure 3:** Co-localization of ki-67 and CD44v or deltaNp63 in precancerous lesions, normal alveoli and bronchi, and esophagus in NTCU-treated mouse lung.

**A:** Double staining of Ki-67 and CD44v or deltaNp63 in precancerous lesions containing atypical bronchiolar hyperplasia, squamous metaplasia, and squamous dysplasia. White arrows indicate double positive Ki-67 and CD44v or deltaNp63 cells. **B:** Double staining of Ki-67 and CD44v or deltaNp63 in NTCU-treated mouse lung (right panels) and esophagus (left panels); the esophagus is used as a positive control. Yellow arrows indicate Karyomegalic alveolar cells. White arrows indicate double positive Ki-67 and CD44v or deltaNp63 cells. Bar=100  $\mu$ m.

**Supplemental Figure 4:** p38 $\alpha$  and phospho-p38 $\alpha$  expression in CD44v positive cancer cells, and LSH and Trim29 expression in deltaNp63 positive cancer cells.

**A, B:** Expression of the CD44v downstream molecules p38 $\alpha$  (**green**) and phospho-p38 $\alpha$  (**green**) in CD44v (**red**) positive cancer cells. **C, D:** Expression of the deltaNp63 downstream markers LSH (**red**) and Trim29 (**red**) in deltaNp63 (**green**) positive cancer cells. CD44v downstream molecules p38 $\alpha$  and phospho-p38 $\alpha$  were observed in CD44v<sup>pos</sup> cancer cells (A and B), and deltaNp63 downstream molecules LSH and Trim29 were observed in deltaNp63<sup>pos</sup> cancer cells (C and D). Bar=100  $\mu$ m.

**Supplemental Figure 5:** Expression of human lung squamous cell carcinoma progression markers in deltaNp63 positive cancer cells.

Expression of PI3K/AKT signaling pathway related molecules PI3K (**A**), phospho-PDK1 (**B**), phospho-mTOR (**C**), phospho-4EBP1 (**D**), and phospho-p70S6K (**E**) and its target protein HIF1 $\alpha$  (**F**); expression of the NFE2F2/KEAP1/CUL3 signaling pathway related molecule Nrf2 (**G**); and expression of the CDKN2A/RB1 signaling pathway molecule CDKN2A/p16 INK4A (**H**) in deltaNp63 positive cancer cells in pLSCCs. Proteins of interest (**red**) are co-stained with deltaNp63 (**green**) and nuclei (**blue**). Yellow in merged images represents co-expression of the protein of interest and deltaNp63. While all the molecules were overexpressed in lung pLSCCs, the overexpression was not deltaNp63<sup>pos</sup>CD44<sup>v<sup>pos</sup></sup> cancer cell-specific or area-specific. Bar=100  $\mu$ m.

**Supplemental Figure 6:** Examination of TAMs, phospho-EGFR, and phospho-STAT3 expression in precancerous lesions in NTCU-treated mice lung.

Examination of TAM markers CD163L1 (**A1-3**), CD68 (**B1-3**), CD204 (**C1-3**), phospho-EGFR (pY1068) (**D1-3**), and phospho-STAT3 (Tyr705) (**E1-3**) in precancerous lesions containing atypical bronchiolar hyperplasia, squamous metaplasia, and squamous dysplasia. TAM marker positive macrophages and phospho-EGFR were seldom detected in these lesions and phospho-STAT3 was not detected in these lesions. Bar=100  $\mu$ m.

Normal bronchioles  
and alveoli

Squamous  
dysplasia

pLSCCs

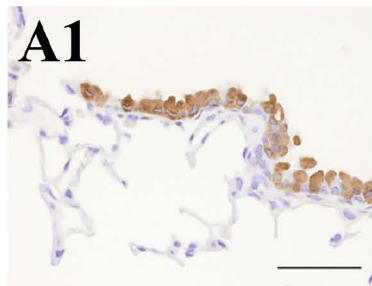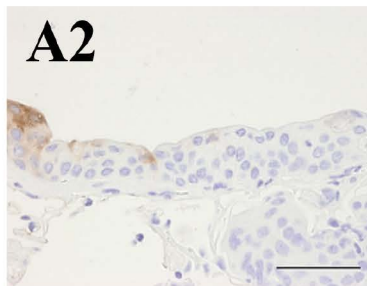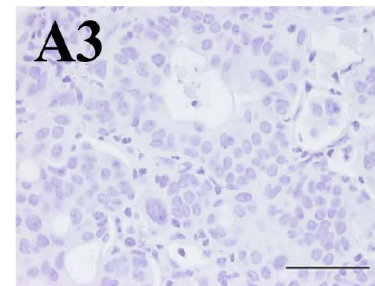

CC10

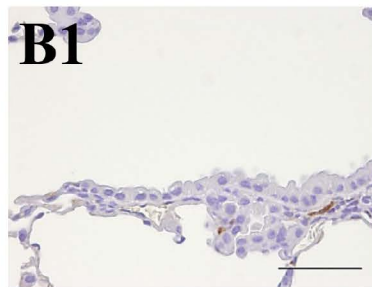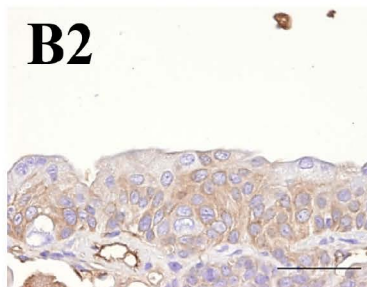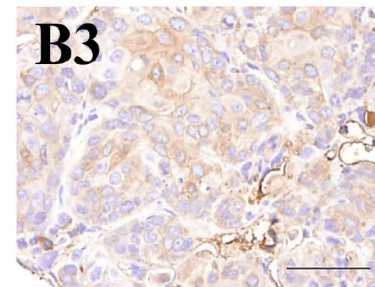

CK5/6

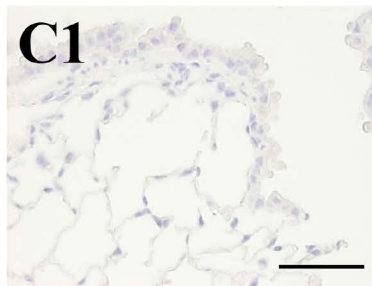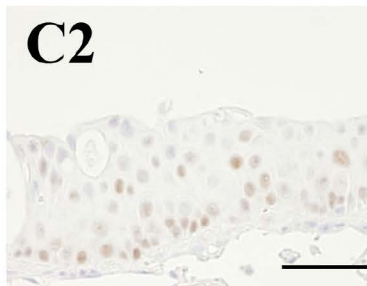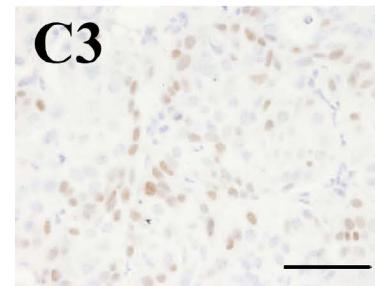

deltaNp63

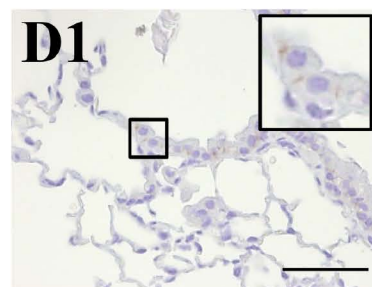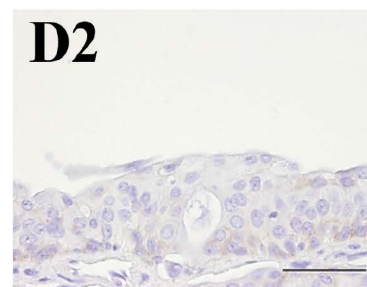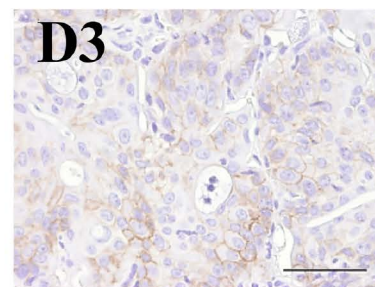

CD44v

**Fig. S1:** Clara cell, Squamous differentiation, and pulmonary stem cell markers in normal bronchioles and alveoli in Acetone-treated mice and in squamous dysplasia and SCC in NTCU-treated mice.

## Normal bronchi in Acetone treated mouse lung

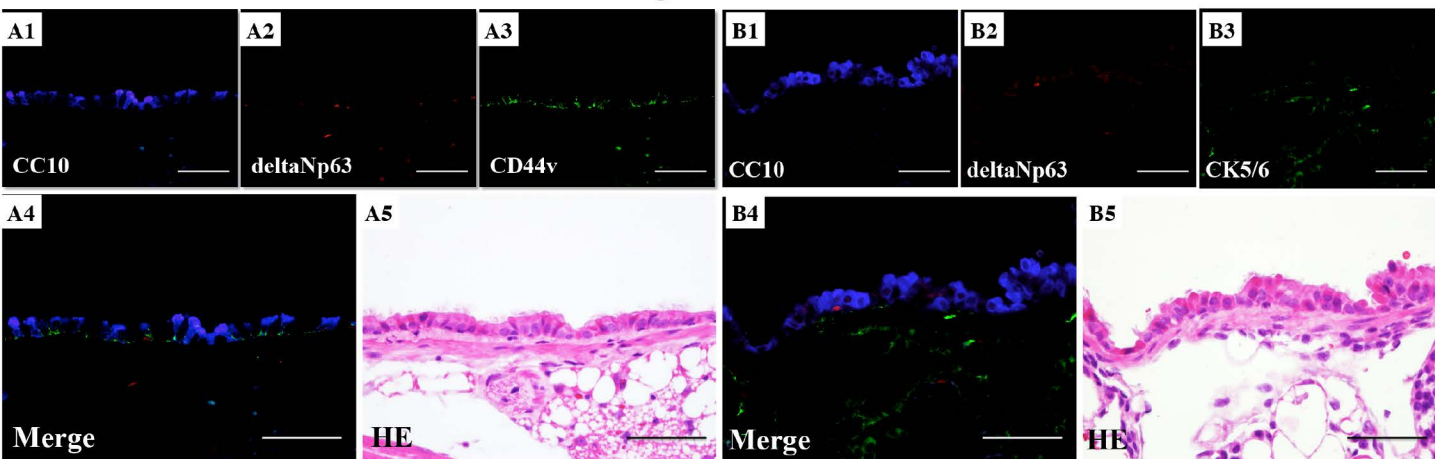

## Normal bronchioles and alveoli in Acetone treated mouse lung

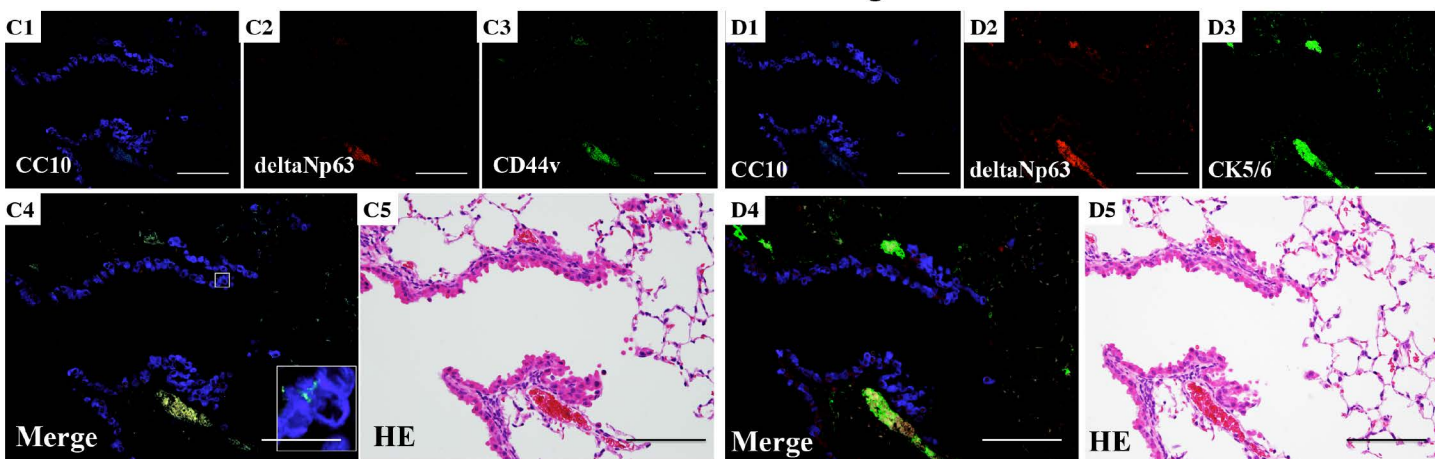

**Fig. S2:** Co-localization of CC10, deltaNp63, and CD44v or CK5/6 proteins in acetone-treated mouse lung bronchi, bronchioles, and alveoli.



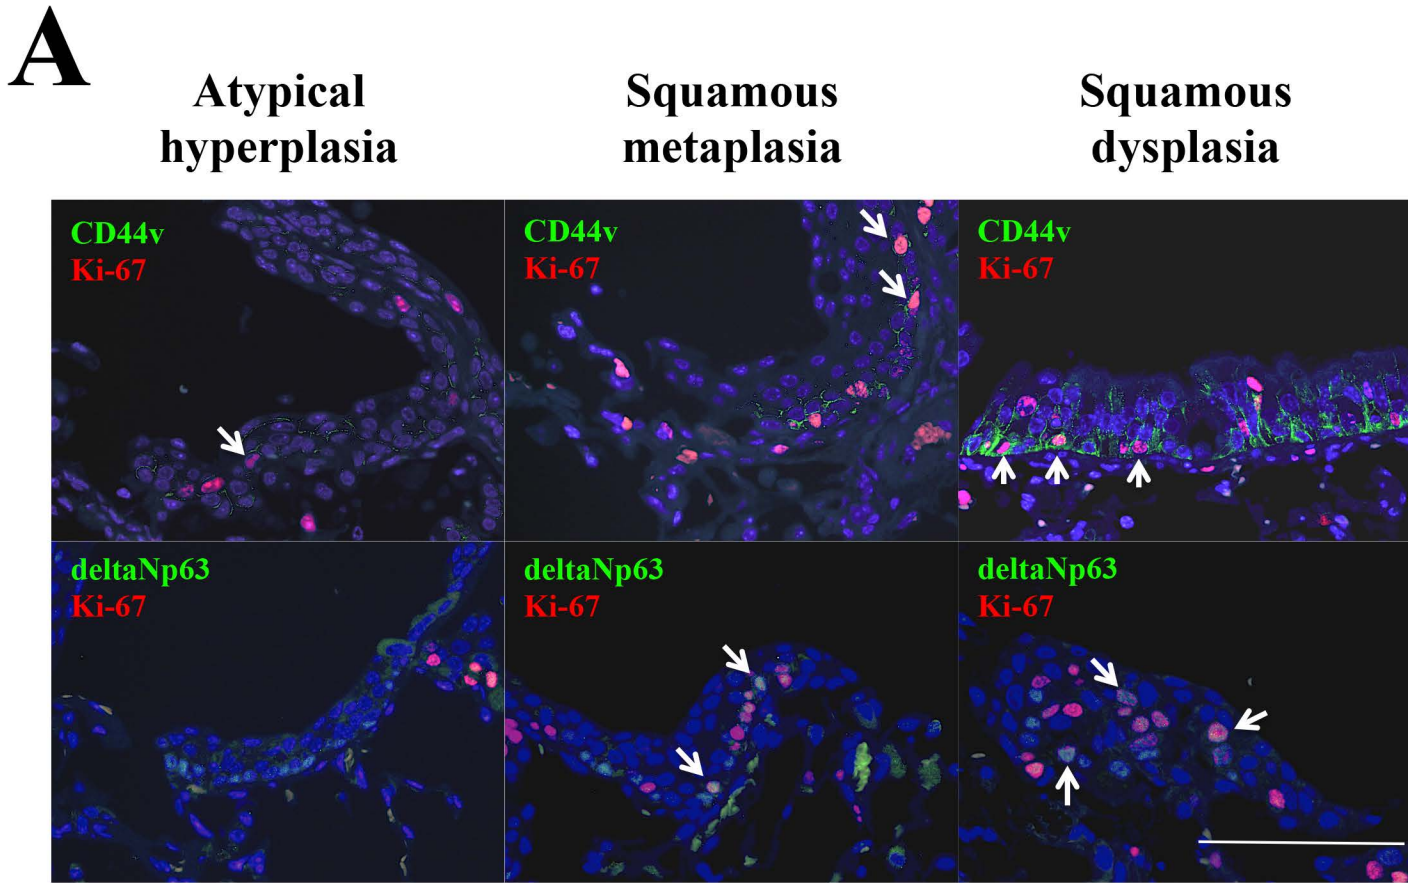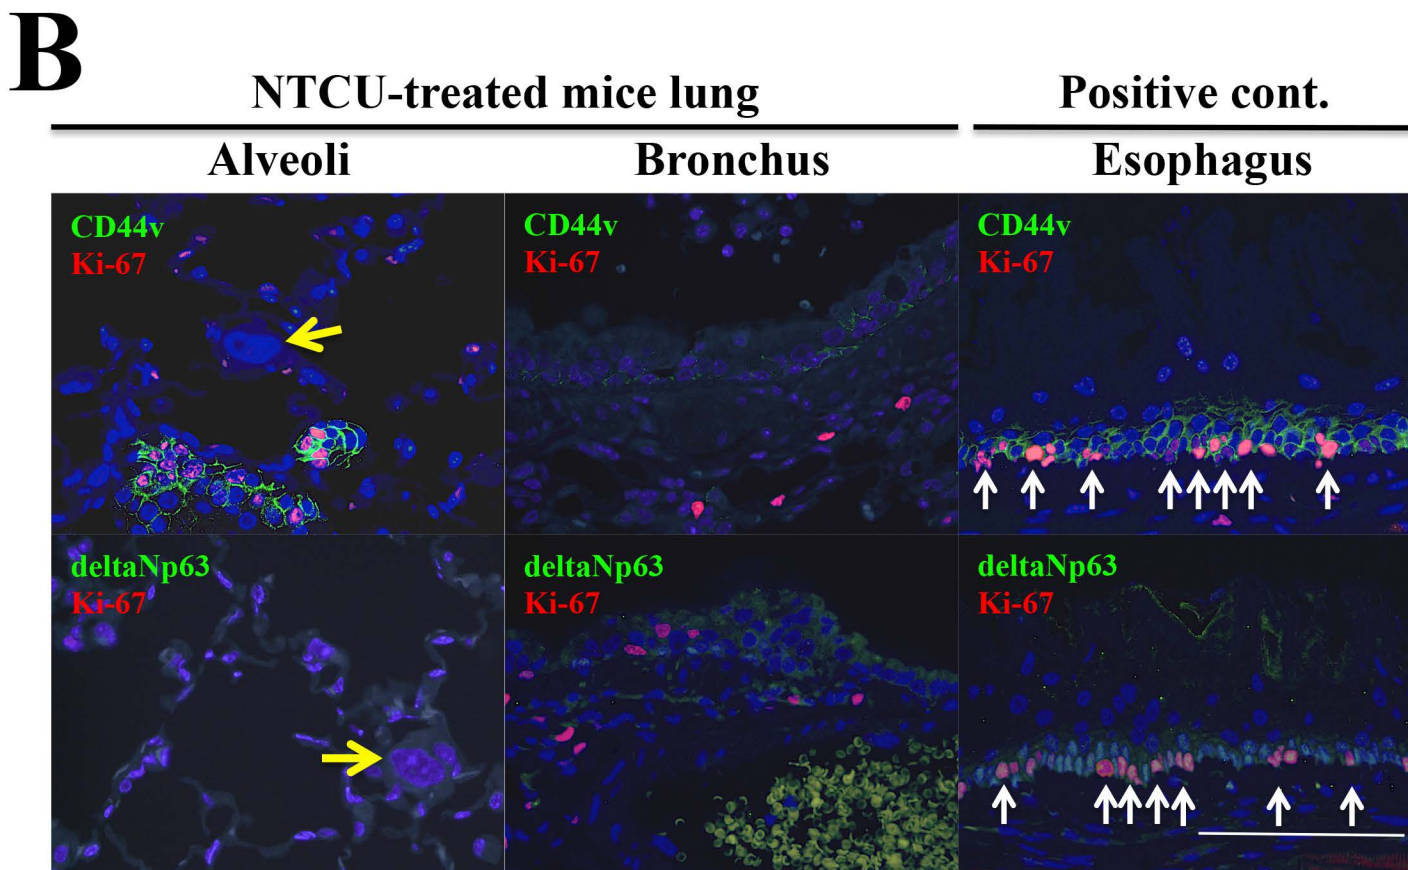

**Fig. S3:** Co-localization of ki-67 and CD44v or deltaNp63 in precancerous lesions, normal alveoli and bronchi, and esophagus in NTCU-treated mouse lung.



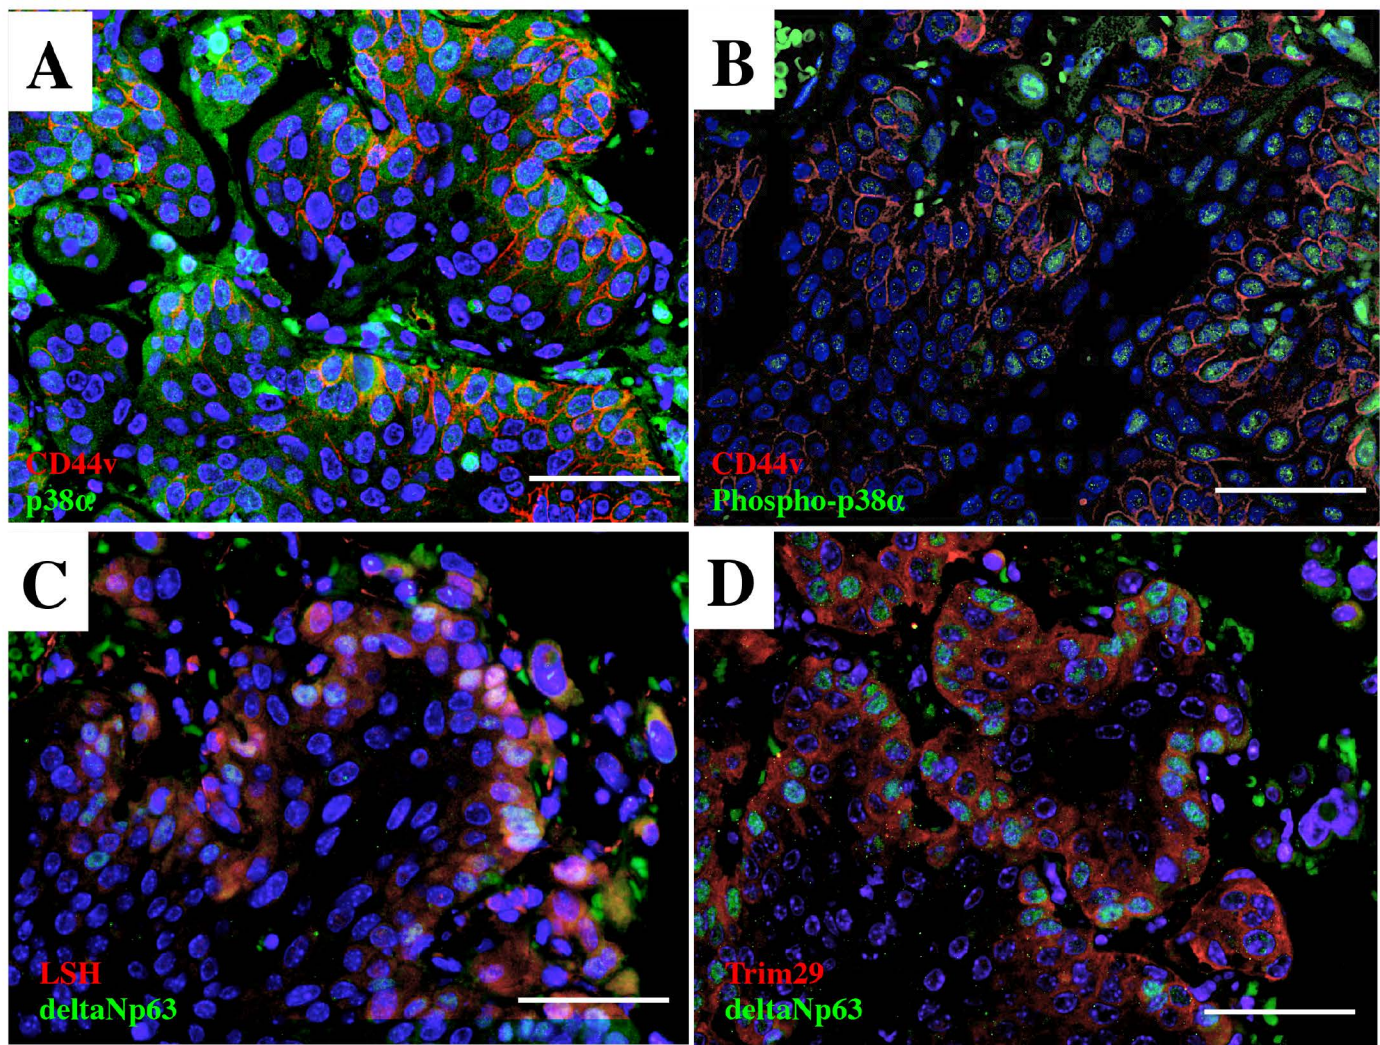

**Fig. S4:** p38 $\alpha$  and phospho-p38 $\alpha$  expression in CD44v positive cancer cells, and LSH and Trim29 expression in deltaNp63 positive cancer cells.



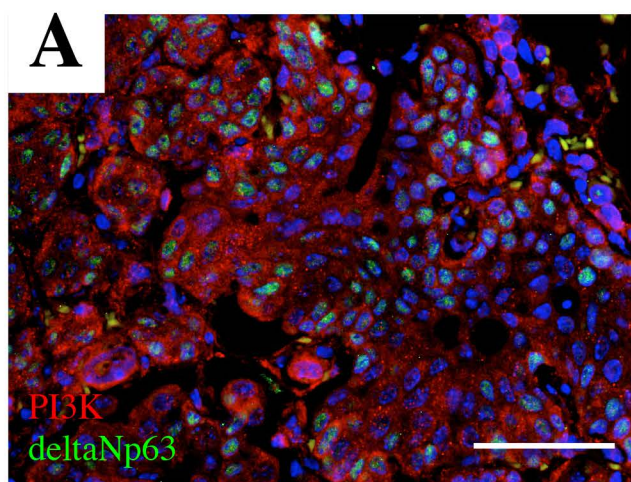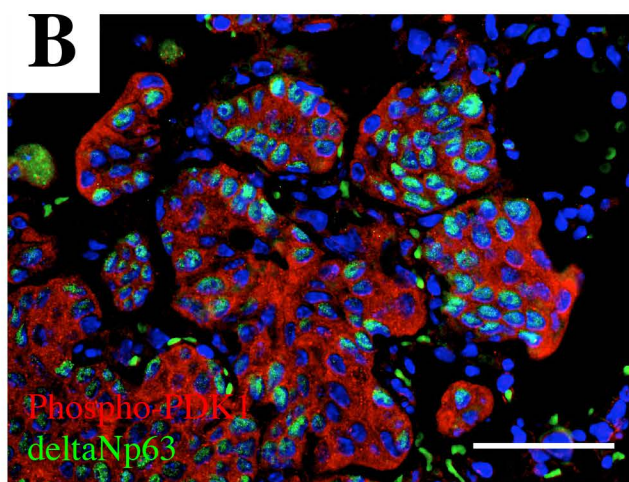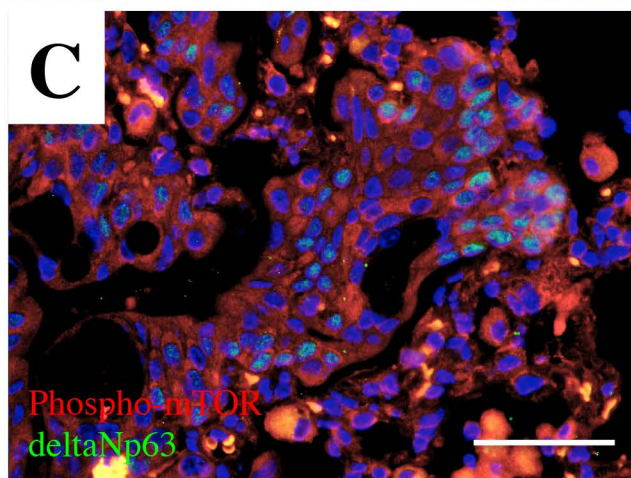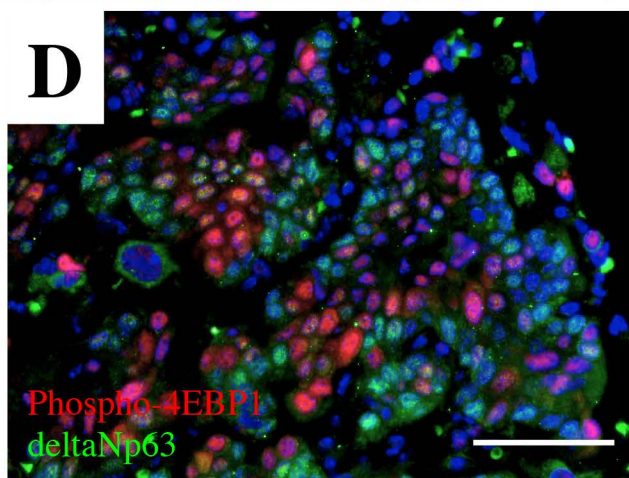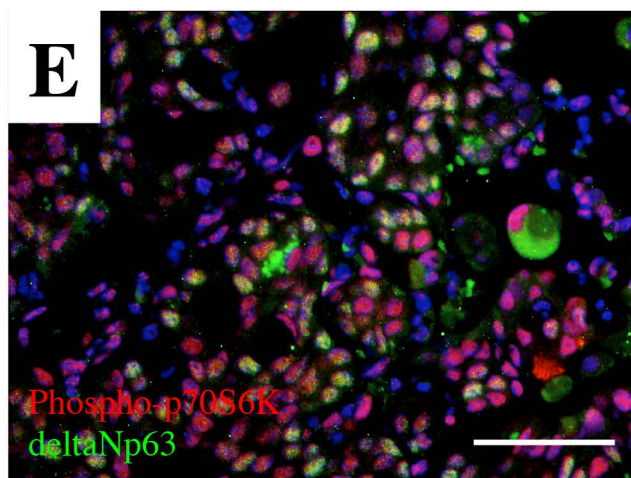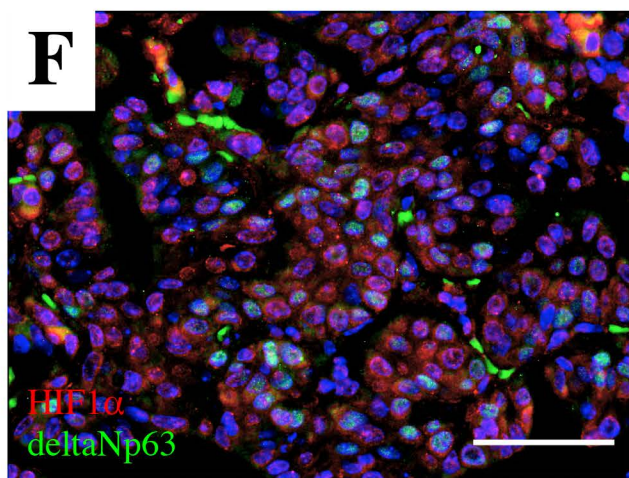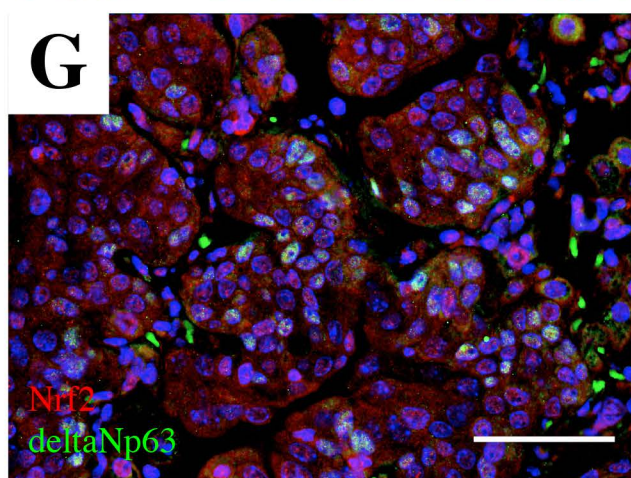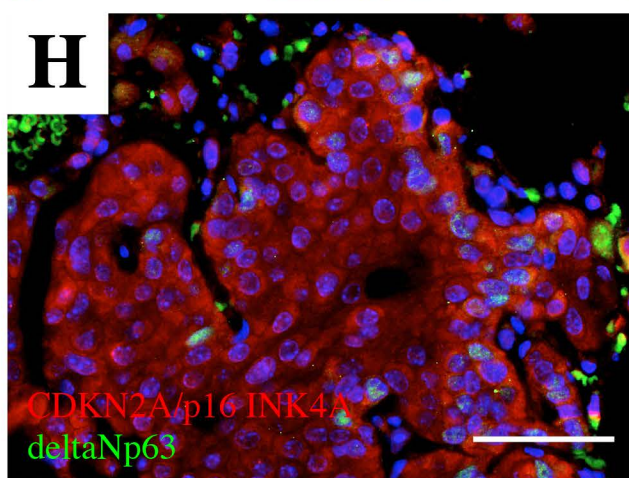

**Fig. S5:** Expression of human lung squamous cell carcinoma progression markers in deltaNp63 positive cancer cells.



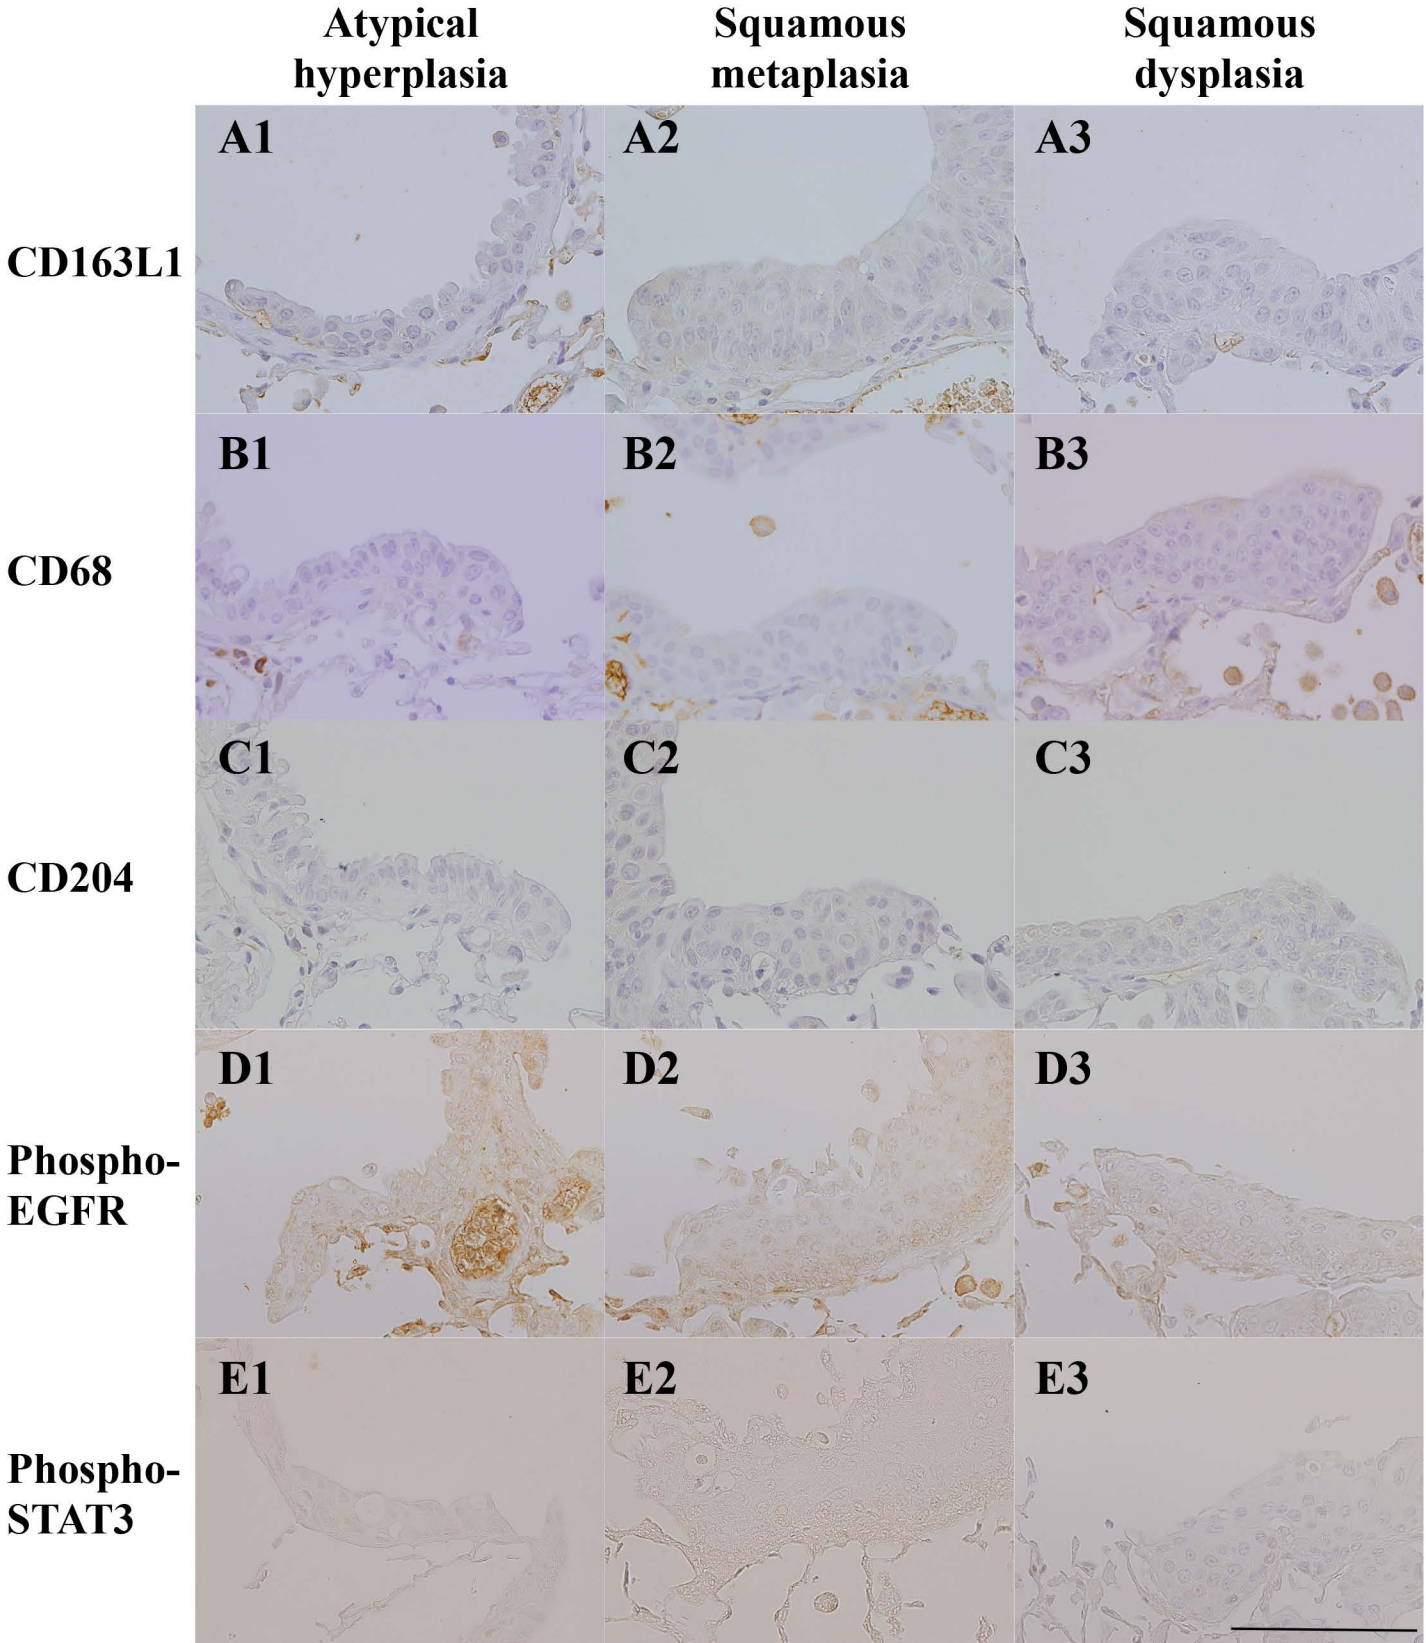

**Fig. S6:** Examination of TAMs, phospho-EGFR, and phospho-STAT3 expression in precancerous lesions in NTCU-treated mice lung.
